# Supplementary material for: Bifurcation kinetics of drug uptake by Gram-negative bacteria
Source: PubMed Central journal article supplement (PMC5604995; doi:10.1371/journal.pone.0184671), 2017-09-19

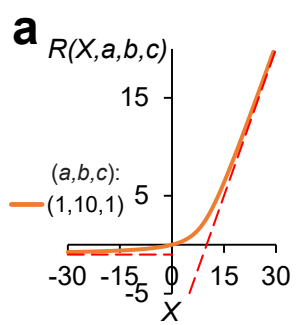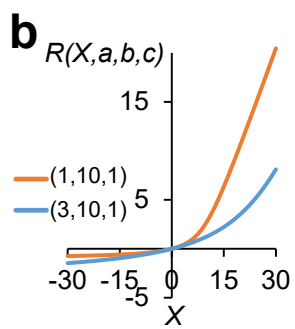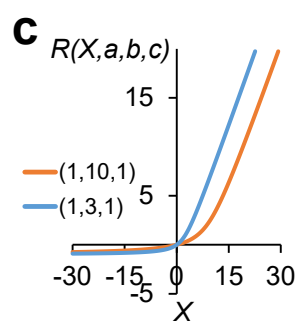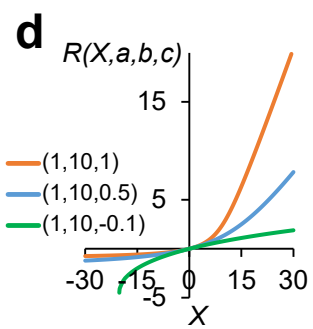

Supplement: pone.0184671.s001.pdf [file pone.0184671.s001.pdf]
